# Supplementary material for: HybPhyloMaker: Target Enrichment Data Analysis From Raw Reads to Species Trees
Source: PubMed Central journal article supplement — Evol Bioinform Online. 2018 Jan 12;14:1176934317742613. doi: 10.1177/1176934317742613 (PMC5768271; doi:10.1177/1176934317742613), 2018-01-12
Supplement: EVB742613_SupplementaryMaterial_REV6.pdf [file EVB742613_SupplementaryMaterial_REV6.pdf]

**Supplement Table 1.** Computer performance of HybPhyloMaker for 6 pairs of FASTQ input files containing 1.3-1.9 million raw reads each and targeting 4,926 exons (1,164 loci); samples from the plant genus *Oxalis*<sup>11</sup>. Scripts were run on a computer equipped with Intel Xeon E7-4860 CPU using 4 cores at 2.27 GHz and running CentOS 7.3.1611.

| SCRIPT                                                             | RUN TIME<br>[HH:MM:SS] | SIZE OF GENERATED<br>FILES [MB] | PEAK RAM<br>[GB] |
|--------------------------------------------------------------------|------------------------|---------------------------------|------------------|
| 0a - data preparation                                              | 0:00:03                | 963                             | 0.01             |
| 0b - pseudoreference generation                                    | 0:00:01                | 3                               | 0.01             |
| 1 - raw read processing                                            | 0:29:05                | 1 888                           | 2.66             |
| 2 - read mapping & consensus calling                               | 1:09:15                | 702                             | 1.91             |
| 3 - exons to probe match                                           | 0:00:05                | 24                              | 0.05             |
| 4 - exon alignment & loci concatenation                            | 0:10:13                | 43                              | 0.03*            |
| 4b - reading frame correction, exon alignment & loci concatenation | 0:21:27                | 101                             | 0.02*            |
| 5 - missing data calculation <sup>a</sup>                          | 0:03:52                | 15                              | 0.25             |
| 6a - RAxML gene trees <sup>b</sup>                                 | 1:39:33                | 85                              | 0.01*            |
| 6a2 - RAxML gene tree properties & summary                         | 0:00:46                | 30                              | 0.17*            |
| 6b - FastTree gene trees <sup>c</sup>                              | 0:02:25                | 9                               | 0.17*            |
| 7 - gene tree combination                                          | 0:00:01                | 1                               | <0.01            |
| 8a - ASTRAL <sup>d</sup>                                           | 0:00:20                | 13                              | 2.08*            |
| 8b - ASTRID <sup>d</sup>                                           | 0:00:05                | < 1                             | 0.04*            |
| 8c - MRL <sup>b</sup>                                              | 0:00:03                | < 1                             | 0.04*            |
| 8e - FastTree (concatenation) <sup>c</sup>                         | 0:02:43                | < 1                             | 4.32*            |
| 8f - ExaML (concatenation), incl. PartitionFinder <sup>e</sup>     | 5:45:25                | 127                             | 9.37*            |
| 9 – update                                                         | 0:00:12                | 3                               | 0.17             |
| 10 - gene tree collapsing & subselect                              | 0:00:05                | 1                               | 0.17             |
| <b>TOTAL</b>                                                       | <b>8:06:06</b>         | <b>4 008</b>                    |                  |

<sup>a</sup>missing data filter: 70% of missing data per sample per gene allowed, 75% presence of samples per gene, <sup>b</sup>100 rapid bootstrap replicates, <sup>c</sup>without bootstrapping, <sup>d</sup>100 multilocus bootstrap replicates, <sup>e</sup>100 bootstrap replicates, \*increases with number of samples.

**Supplement Table 2.** Comparison of three different read mapping software (Bowtie 2.2.4 with very-sensitive-local settings, BWA 0.7.15 with default settings using 'bwa mem', and Geneious 6.1.5 with medium sensitivity). Raw 2x150 bp Illumina reads from six samples from the plant genus *Oxalis*<sup>11</sup> were pre-processed (adapter-trimmed, quality-filtered, and de-duplicated) using HybPhyloMaker1. Both paired-end and orphaned reads were mapped to a "pseudoreference" consisting of 4,926 exon sequences separated by 400 Ns each. Number and percentage of mapped reads (for all three mappers) and percentage of reads mapped relatively to Geneious are presented.

| NAME AND CODE                   | NR. OF RAW READS | NR. OF PAIRED READS | NR. OF FORWARD UNPAIRED READS | NR. OF REVERSE UNPAIRED READS | NR. OF MAPPED READS | BOWTIE 2          |                                        |                     | BWA               |                                        |                     | GENEIOUS                               |                     |  |
|---------------------------------|------------------|---------------------|-------------------------------|-------------------------------|---------------------|-------------------|----------------------------------------|---------------------|-------------------|----------------------------------------|---------------------|----------------------------------------|---------------------|--|
|                                 |                  |                     |                               |                               |                     | % OF MAPPED READS | % OF MAPPED READS RELATIVE TO GENEIOUS | NR. OF MAPPED READS | % OF MAPPED READS | % OF MAPPED READS RELATIVE TO GENEIOUS | NR. OF MAPPED READS | % OF MAPPED READS RELATIVE TO GENEIOUS | NR. OF MAPPED READS |  |
| <i>Oxalis blastorrhiza</i> J557 | 1,303,985        | 1,231,666           | 55,107                        | 17,212                        | 193,596             | 14.9%             | 80.9%                                  | 223,885             | 17.1%             | 93.4%                                  | 239,171             | 18.3%                                  |                     |  |
| <i>Oxalis creaseyji</i> J11-961 | 1,167,004        | 1,119,048           | 32,483                        | 15,473                        | 243,657             | 20.9%             | 80.9%                                  | 281,520             | 24.0%             | 93.1%                                  | 301,336             | 25.8%                                  |                     |  |
| <i>Oxalis gracilis</i> J558     | 1,051,773        | 1,006,128           | 32,432                        | 13,213                        | 304,092             | 28.9%             | 81.6%                                  | 347,434             | 32.9%             | 92.8%                                  | 372,499             | 35.4%                                  |                     |  |
| <i>Oxalis helicooides</i> J319  | 1,489,410        | 1,432,492           | 38,972                        | 17,946                        | 263,261             | 17.7%             | 77.4%                                  | 304,272             | 20.4%             | 89.1%                                  | 340,109             | 22.8%                                  |                     |  |
| <i>Oxalis inconspicua</i> J595  | 1,231,224        | 1,169,552           | 43,894                        | 17,778                        | 211,367             | 17.2%             | 79.3%                                  | 242,862             | 19.7%             | 90.9%                                  | 266,399             | 21.6%                                  |                     |  |
| <i>Oxalis polyphylla</i> J11-44 | 1,425,204        | 1,348,436           | 61,618                        | 15,150                        | 160,534             | 11.3%             | 67.6%                                  | 186,046             | 13.0%             | 78.2%                                  | 237,300             | 16.7%                                  |                     |  |
