# Supplementary material for: HybPhyloMaker: Target Enrichment Data Analysis From Raw Reads to Species Trees
Source: PubMed Central journal article supplement — Evol Bioinform Online. 2018 Jan 12;14:1176934317742613. doi: 10.1177/1176934317742613 (PMC5768271; doi:10.1177/1176934317742613), 2018-01-12
Supplement: SupplementaryFigure.pdf [file SupplementaryFigure.pdf]

Supplement Figure 1: Visualization of reads originating from *Oxalis polyphylla* J11-44 mapped to the "pseudoreference" (black arrow) using Geneious. A – locus 11 339, exon 3. B – locus 11 386, exon 2. Polymorphic single nucleotide polymorphisms (SNPs) compared to the pseudoreference are highlighted in form of coloured squares compared to agreements with the pseudoreference marked as gray bars. The majority of reads (31× coverage in A, 42× coverage in B) are relatively similar to the pseudoreference (11 SNPs in A, 9 SNPs in B), whereas the alternative reads (paralogs or alleles; 7× coverage in A, 20× coverage in B) show a much higher number of SNPs compared to the pseudoreference (around 21 SNPs in A, around 26 SNPs in B). These reads of lower abundance are marked with red dots. Only the dominant variants influence the resulting consensus sequence (red arrow), which is used in subsequent analyses.

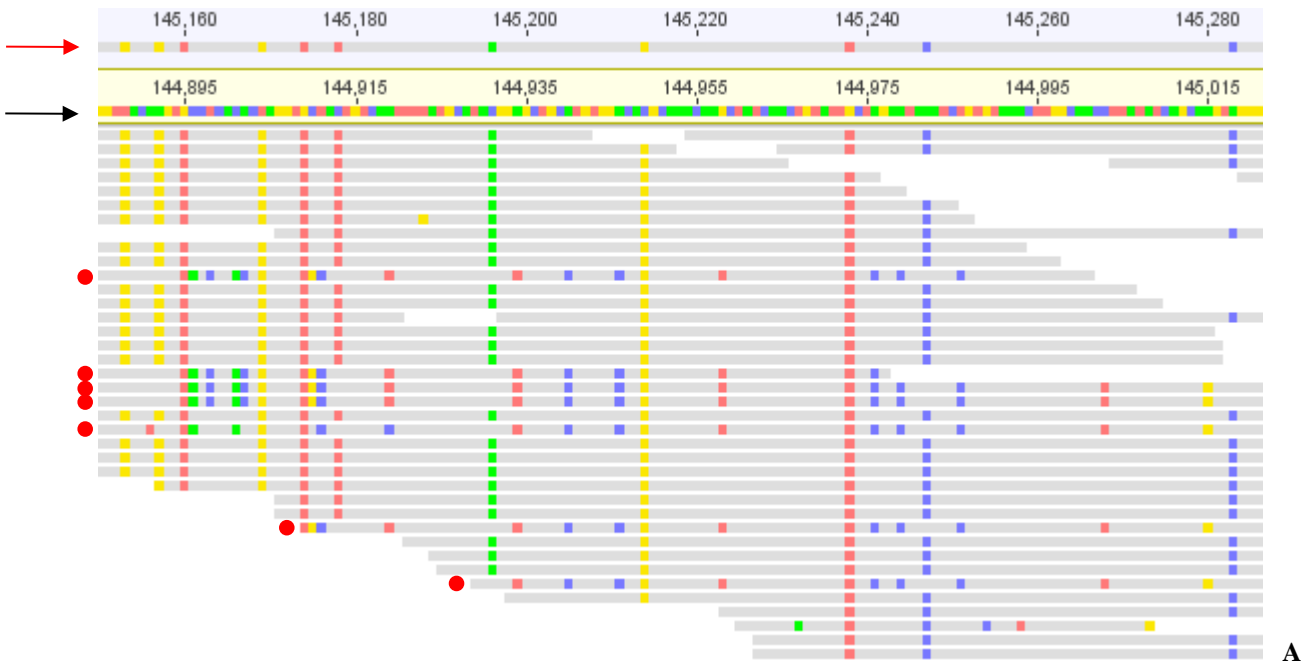

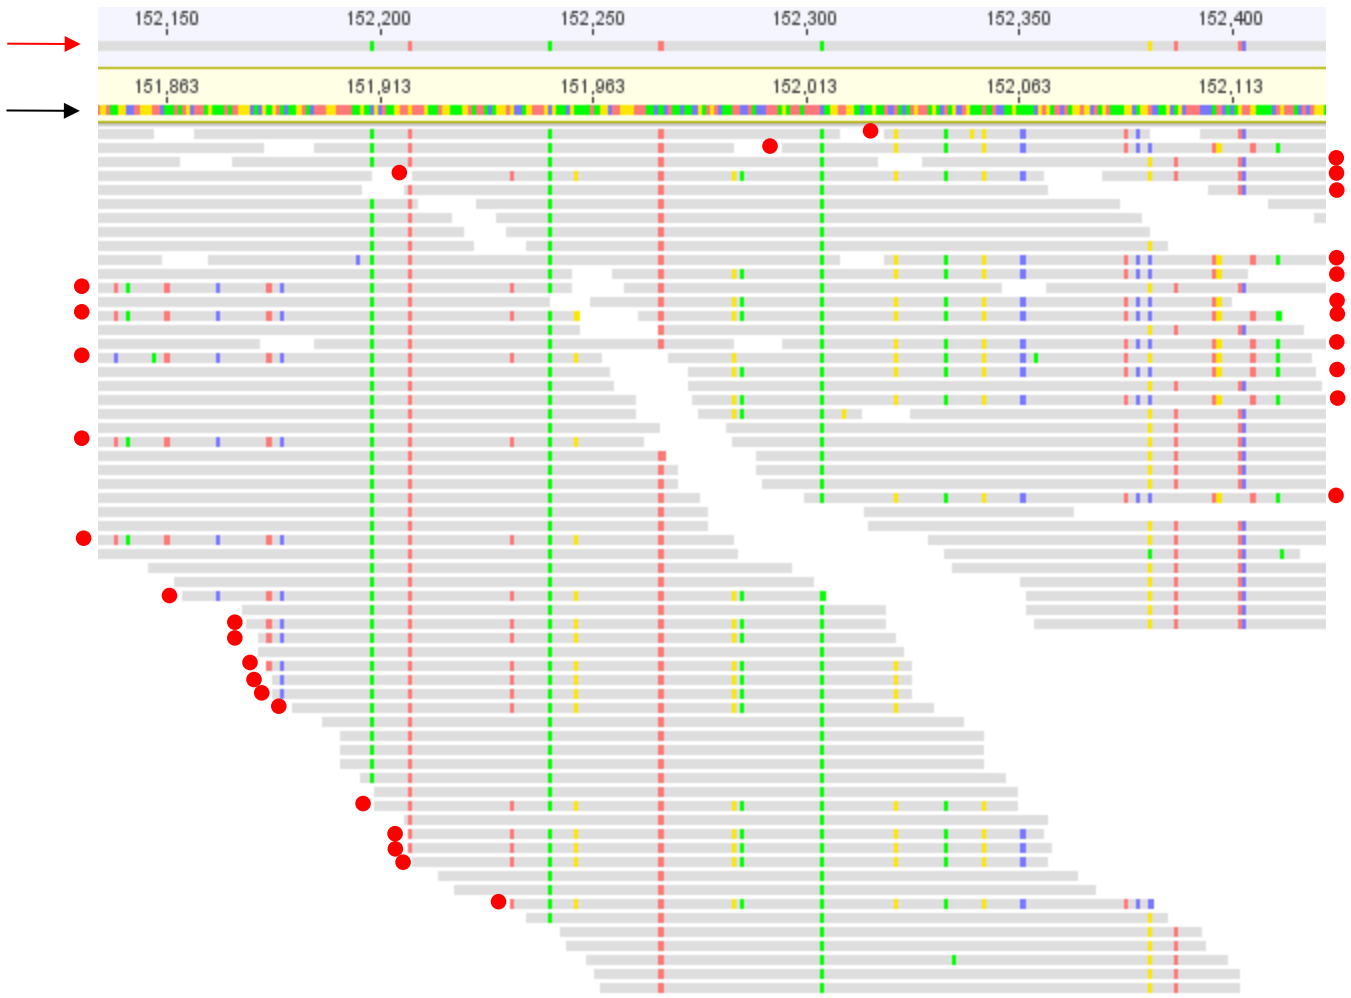

**B**
